# Supplementary material for: Evidence-Based Practice for the Clinical Assessment of Psychogenic Nonepileptic Seizures: A Report From the American Neuropsychiatric Association Committee on Research
Source: Atypon-hosted journal article supplement (doi:10.1176/appi.neuropsych.19120354), 2020-08-11
Supplement: appi.neuropsych.19120354.ds001.pdf [file appi.neuropsych.19120354.ds001.pdf]

**Supplementary Material** (available online)

**Appendix S1.** Search terms for PNES.

(PNES[tiab] OR NEAD[tiab] OR nonepileptic convulsion [tw] OR non-epileptic convulsion [tw] OR nonepileptic seizure [tw] OR non-epileptic seizure [tw] OR nonepileptic attack [tw] OR non-epileptic attack [tw] OR nonepileptic spell [tw] OR non-epileptic spell [tw] OR nonepileptic event [tw] OR non-epileptic event [tw] OR psychogenic convulsion [tw] OR psychogenic seizure [tw] OR psychogenic attack [tw] OR psychogenic spell [tw] OR psychogenic event [tw] OR pseudo seizure [tw] OR pseudo-seizure [tw] OR dissociative convulsion [tw] OR dissociative seizure [tw] OR conversion convulsion [tw] OR conversion seizure [tw] OR pseudoepilepsy [tw] OR pseudo-epilepsy [tw] OR pseudoepileptic convulsion [tw] OR pseudoepileptic seizure [tw] OR pseudoepileptic attack [tw] OR pseudoepileptic spell [tw] OR pseudoepileptic event [tw] OR pseudo-epileptic convulsion [tw] OR pseudo-epileptic seizure [tw] OR pseudo-epileptic attack [tw] OR pseudo-epileptic spell [tw] OR pseudo-epileptic event [tw] OR functional neurological disorder [tw] OR functional neurological symptom disorder [tw] OR non-epileptic attack disorder [tw] OR nonepileptic attack disorder [tw] OR nonepileptic convulsions [tw] OR non-epileptic convulsions [tw] OR nonepileptic seizures [tw] OR non-epileptic seizures [tw] OR nonepileptic attacks [tw] OR non-epileptic attacks [tw] OR nonepileptic spells [tw] OR non-epileptic spells [tw] OR nonepileptic events [tw] OR non-epileptic events [tw] OR psychogenic convulsions [tw] OR psychogenic seizures [tw] OR psychogenic attacks [tw] OR psychogenic spells [tw] OR psychogenic events [tw] OR pseudoseizures [tw] OR pseudo-seizures [tw] OR dissociative convulsions [tw] OR dissociative seizures [tw] OR conversion convulsions [tw] OR conversion seizures [tw] OR pseudoepilepsy [tw] OR pseudo-epilepsy [tw] OR pseudoepileptic convulsions [tw] OR pseudoepileptic seizures [tw] OR pseudoepileptic attacks [tw] OR pseudoepileptic spells [tw] OR pseudoepileptic events [tw] OR pseudo-epileptic convulsions [tw] OR pseudo-epileptic seizures [tw] OR pseudo-epileptic attacks [tw] OR pseudo-epileptic spells [tw] OR pseudo-epileptic events [tw] OR functional neurological disorders [tw] OR functional neurological symptom disorders [tw] OR non-epileptic attack disorders [tw] OR nonepileptic attack disorders [tw] OR hysterical seizure [tw] OR hysterical seizures [tw] OR hysteroepilepsy [tw] OR hystero-epilepsy [tw] OR hysterical convulsion [tw] OR hysterical convulsions [tw] OR hysterical attack [tw] OR hysterical attacks [tw] OR hysterical spell [tw] OR hysterical spells [tw] OR hysterical event [tw] OR hysterical events [tw])

**Table S1.** Common medical differential diagnoses to be considered during clinical assessment of PNES.

| Differential diagnosis        | Differentiation from PNES                                                                                                                                                                                                                                                                                     | Differentiating tests                                                                               |
|-------------------------------|---------------------------------------------------------------------------------------------------------------------------------------------------------------------------------------------------------------------------------------------------------------------------------------------------------------|-----------------------------------------------------------------------------------------------------|
| Epilepsy                      | Shorter duration<br>Stereotypical semiology<br>Incontinence and injury more common<br>Eyes open<br>Post-ictal confusion<br>If unresponsive, expect amnesia for some part of seizure                                                                                                                           | EEG<br>Video EEG                                                                                    |
| Syncope                       | Very short duration (seconds)<br>Prodromal signs usually present (lightheadedness, pallor, diaphoresis, nausea/ vomiting, tunnel vision)<br>Triggered by changes in position (standing) or specific situations (micturition, blood draws)<br>Can be accompanied by myoclonic jerks<br>No post-event confusion | ECG<br>Holter ECG<br>Tilt table test                                                                |
| Parasomnias                   | Complex behaviors during sleep (eating, walking, etc)<br>Behaviors are not stereotyped<br>Usually last minutes<br>No or little recollection of the event<br>NREM parasomnias typically start in childhood                                                                                                     | PSG or video PSG                                                                                    |
| Narcolepsy with cataplexy     | Excessive daytime sleepiness, sleep attacks, sleep paralysis, hypnagogic hallucinations<br>Cataplexy: sudden transient episodes of loss of tone with preserved consciousness, triggered by strong emotions<br>Onset in childhood or young adulthood                                                           | PSG and MSLT                                                                                        |
| Paroxysmal movement disorders | Can include: dyskinesias, dystonia, myoclonus, ballismus, tics, tremors<br>Preserved consciousness<br>Improvement of movement during sleep<br>Some may be triggered by exercise or sudden movement                                                                                                            | Clinical diagnosis<br>Imaging as clinically indicated                                               |
| Transient ischemic attacks    | Usually negative symptoms (weakness, aphasia, numbness)<br>Limb shaking may occur with brief, irregular movements<br>Preserved consciousness<br>Last minutes to hours<br>Cardiovascular risk factors usually present                                                                                          | Brain imaging<br>Carotid ultrasound<br>ECG<br>Echocardiogram<br>Other studies depending on etiology |
| Migraines                     | Auras with visual, sensory, and rarely motor/speech symptoms.<br>Some types include auras with dysarthria, vertigo, tinnitus.<br>Headache often unilateral, throbbing, worsens w/exercise, associated with nausea/ vomiting, phono/photophobia.<br>Fully reversible weakness in hemiplegic migraine.          | Clinical diagnosis<br>Imaging as clinically indicated                                               |
| Transient global amnesia      | Hours in duration<br>Repetitive questions demonstrating poor recent memory<br>Can carry out complex activities                                                                                                                                                                                                | Imaging as clinically indicated                                                                     |
| Vestibular disorder           | Severe vertigo<br>Tinnitus<br>Preserved awareness                                                                                                                                                                                                                                                             | Vestibular exam                                                                                     |
| Breath holding spells         | In young children (1-3 years old)<br>Brief loss of consciousness<br>No post-event confusion<br>Pallor and cyanosis may be present                                                                                                                                                                             | Clinical diagnosis                                                                                  |
| Panic disorder                | Peaks in minutes<br>Autonomic symptoms<br>Not associated with loss of consciousness                                                                                                                                                                                                                           | DSM 5 criteria<br>Developmental history                                                             |
| Dissociative disorder         | Depersonalization and/ or derealization<br>Lasts minutes to hours<br>No convulsive activity                                                                                                                                                                                                                   | DSM 5 criteria<br>Developmental history                                                             |

EEG: electroencephalogram; ECG: electrocardiogram; NREM: non rapid eye movement; PSG: polysomnography; MSLT: multiple sleep latency test.

**Table S2.** Example of biopsychosocial (BPS) neuropsychiatric case formulation with predisposing, precipitating and perpetuating (PPP) factors.

|                       | Bio                                                                                                      | Psycho                                                                              | Social                                                                                             |
|-----------------------|----------------------------------------------------------------------------------------------------------|-------------------------------------------------------------------------------------|----------------------------------------------------------------------------------------------------|
| Predisposing factors  | Family history of psychiatric disorders, developmental delay, increased resting levels of bodily arousal | Childhood adversity, alexithymia, dissociative tendencies, dysfunctional attachment | Dysfunctional and chaotic upbringing                                                               |
| Precipitating factors | Traumatic brain injury, traumatic or prolonged medical procedures                                        | Recent sexual or psychological trauma                                               | Interpersonal conflicts, unemployment                                                              |
| Perpetuating factors  | Chronic medical problems, medication side effects, undertreated pain                                     | Untreated comorbid psychiatric disorders, avoidant behavior, sick identity          | Ongoing litigations, ongoing interpersonal conflicts, primary gain in frequent hospital admissions |

## Figure S1 Legend

Figure S1. Iterative search process for prolactin level in connection to PNES.

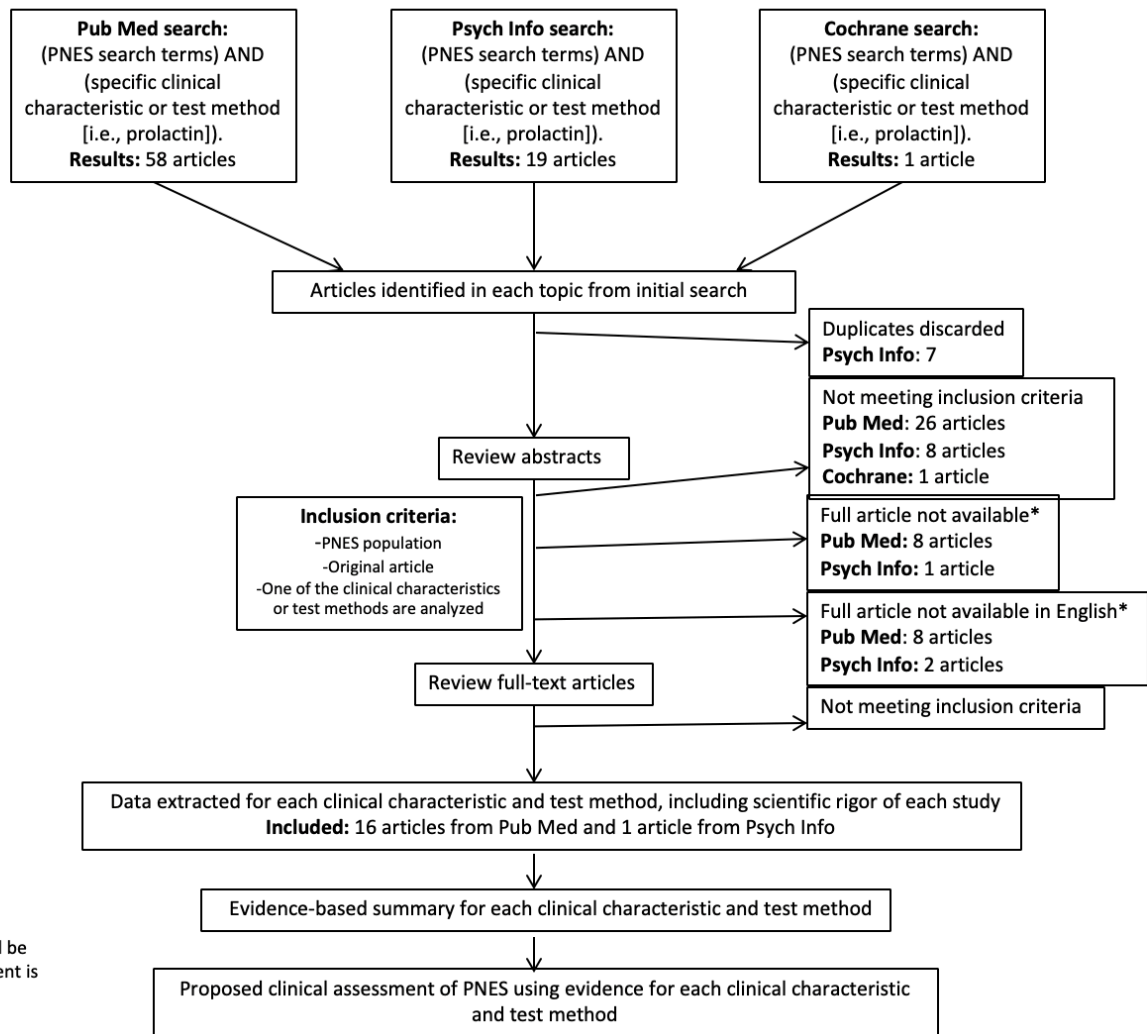

## **Supplementary references included in data extraction (presented per section, ordered alphabetically)**

### *Semiology*

- Asadi-Pooya AA, Wyeth D, Sperling MR: Ictal crying. *Epilepsy Behav* 2016; 59:1–3
- Azar NJ, Tayah TF, Wang L, Song Y, Abou-Khalil BW: Postictal breathing pattern distinguishes epileptic from nonepileptic convulsive seizures. *Epilepsia* 2008; 49:132–7
- Bazil CW, Walczak TS: Effects of sleep and sleep stage on epileptic and nonepileptic seizures. *Epilepsia* 1997; 38:56–62
- Bell WL, Park YD, Thompson EA, Radtke RA: Ictal cognitive assessment of partial seizures and pseudoseizures. *Arch Neurol* 1998; 55:1456–9
- Benbadis SR, Lancman ME, King LM, Swanson SJ: Preictal pseudosleep: a new finding in psychogenic seizures. *Neurology* 1996; 47:63–7
- Brigo F, Nardone R, Ausserer H, Storti M, Tezzon F, Manganotti P, Bongiovanni LG: The diagnostic value of urinary incontinence in the differential diagnosis of seizures. *Seizure* 2013; 22:85–90
- Cervenka MC, Lesser R, Tran TT, Fortune T, Muthugovindan D, Miglioretti DL: Does the teddy bear sign predict psychogenic nonepileptic seizures? *Epilepsy Behav* 2013; 28:217–20
- Chen DK, Graber KD, Anderson CT, Fisher RS: Sensitivity and specificity of video alone versus electroencephalography alone for the diagnosis of partial seizures. *Epilepsy Behav* 2008; 13:115–8
- Chung SS, Gerber P, Kirlin KA: Ictal eye closure is a reliable indicator for psychogenic nonepileptic seizures. *Neurology* 2006; 66:1730–1
- De Paola L, Terra VC, Silvado CE, Teive HA, Palmieri A, Valente KD, Olandoski M, LaFrance WC Jr: Improving first responders' psychogenic nonepileptic seizures diagnosis accuracy: Development and validation of a 6-item bedside diagnostic tool. *Epilepsy Behav* 2016; 54:40–6
- DeToledo JC, Ramsay RE: Patterns of involvement of facial muscles during epileptic and nonepileptic events: review of 654 events. *Neurology* 1996; 47:621–5
- Devinsky O Sanchez-Vallasenor F, Vazquez B, Khotari M, Alper K, Luciano D: Clinical profile of patients with epileptic and nonepileptic seizures. *Neurology* 1996; 46:1530–3
- Gates JR, Ramani V, Whalen S, Loewenson R: Ictal characteristics of pseudoseizures. *Arch Neurol* 1985; 42:1183–7
- Geyer JD, Payne TA, Drury I: The value of pelvic thrusting in the diagnosis of seizures and pseudoseizures. *Neurology* 2000; 54:227–9
- Groppe G, Kapitany T, Baumgartner C: Cluster analysis of clinical seizure semiology of psychogenic nonepileptic seizures. *Epilepsia* 2000; 41:610–4
- Kuyk J, Spinhoven P, Dyck R van: Hypnotic recall: a positive criterion in the differential diagnosis between epileptic and pseudoepileptic seizures. *Epilepsia* 1999; 40:485–91
- Oliva M, Pattison C, Carino J, Roten A, Matkovic Z, O'Brien TJ: The diagnostic value of oral lacerations and incontinence during convulsive "seizures." *Epilepsia* 2008; 49:962–7
- Pestana Knight EM, Grinenko O, Bulacio J, Bingaman W, Gupta A, Chauvel P: Arc de cercle as a manifestation of focal epileptic seizures. *Neurol Clin Pract* 2018; 8:354–6
- Saygi S, Katz A, Marks DA, Spencer SS: Frontal lobe partial seizures and psychogenic seizures: comparison of clinical and ictal characteristics. *Neurology* 1992; 42:1274–7
- Seneviratne U, Minato E, Paul E: How reliable is ictal duration to differentiate psychogenic nonepileptic seizures from epileptic seizures? *Epilepsy Behav* 2017; 66:127–31
- Slater JD, Brown MC, Jacobs W, Ramsay RE: Induction of pseudoseizures with intravenous saline placebo. *Epilepsia* 1995; 36:580–5
- Syed TU, LaFrance WC Jr, Kahriman ES, Hasan SN, Rajasekaran V, Gulati D, Borad S, Shahid A, Fernandez-Baca G, Garcia N, Pawlowski M, Loddenkemper T, Amina S, Koubeissi MZ: Can semiology predict psychogenic nonepileptic seizures? A prospective study. *Ann Neurol* 2011; 69:997–1004
- Walczak TS, Bogolioubov A: Weeping during psychogenic nonepileptic seizures. *Epilepsia* 1996; 37:208–10

### *Video EEG*

- Angus-Leppan H: Seizures and adverse events during routine scalp electroencephalography: a clinical and EEG analysis of 1000 records. *Clin Neurophysiol* 2007; 118:22–30
- Barry JJ, Atzman O, Morrell MJ: Discriminating between epileptic and nonepileptic events: the utility of hypnotic seizure induction. *Epilepsia* 2000; 41:81–84

Bazil CW, Kothari M, Luciano D, et al.: Provocation of nonepileptic seizures by suggestion in a general seizure population. *Epilepsia* 1994; 35:768–770

Benbadis SR, Johnson K, Anthony K, et al.: Induction of psychogenic nonepileptic seizures without placebo. *Neurology* 2000; 55:1904–5

Benbadis SR, Siegrist K, Tatum WO, et al.: Short-term outpatient EEG video with induction in the diagnosis of psychogenic seizures. *Neurology* 2004; 63:1728–30

Benbadis SR, Tatum WO: Overinterpretation of EEGs and misdiagnosis of epilepsy. *J Clin Neurophysiol* 2003; 20:42–4

Bettini L, Croquelois A, Maeder-Ingvar M, et al.: Diagnostic yield of short-term video-EEG monitoring for epilepsy and PNESs: a European assessment. *Epilepsy Behav* 2014; 39:55–8

Bhatia M, Sinha PK, Jain S, et al.: Usefulness of short-term video EEG recording with saline induction in pseudoseizures. *Acta Neurol Scand* 1997; 95:363–366

Chen DK, Izadyar S, Collins RL, et al.: Induction of psychogenic nonepileptic events: success rate influenced by prior induction exposure, ictal semiology, and psychological profiles. *Epilepsia* 2011; 52:1063–70

Cianci V, Ferlazzo E, Condino F, et al.: Rating scale for psychogenic nonepileptic seizures: scale development and clinimetric testing. *Epilepsy Behav* 2011; 21:128–131

Cohen RJ, Suter C: Hysterical seizures: suggestion as a provocative EEG test. *Ann Neurol* 1982; 11:391–395

Deeley Q, Walsh E, Oakley DA, et al.: Using hypnotic suggestion to model loss of control and awareness of movements: an exploratory fMRI study. *PLoS One* 2013; 8:e78324

Dericioglu N, Saygi S, Ciger A: The value of provocation methods in patients suspected of having non-epileptic seizures. *Seizure* 1999; 8:152–156

Desai SD, Desai D, Jani T: Role of Short Term Video Encephalography with Induction by Verbal Suggestion in Diagnosis of Suspected Paroxysmal Nonepileptic Seizure-Like Symptoms. *Epilepsy Res Treat* 2016; 2016:2801369

Foreid H, Bentes C, Pimentel J: The use of placebo as a provocative test in the diagnosis of psychogenic non epileptic seizures. *Neuroethics* 2010; 3:95–98

Gambini O, Demartini B, Chiesa V, et al.: Long-term outcome of psychogenic nonepileptic seizures: the role of induction by suggestion. *Epilepsy Behav* 2014; 41:140–143

Garekar H, Dhiman V: A case of pseudoseizures precipitated by anticonvulsant toxicity. *Gen Hosp Psychiatry* 2015; 37:372.e1–2

Goyal G, Kalita J, Misra UK: Utility of different seizure induction protocols in psychogenic nonepileptic seizures. *Epilepsy Res* 2014; 108:1120–1127

Hoepner R, Labudda K, Schoendienst M, et al.: Informing patients about the impact of provocation methods increases the rate of psychogenic nonepileptic seizures during EEG recording. *Epilepsy Behav* 2013; 28:457–9

Hovorka J, Nežadal T, Herman E, et al.: Psychogenic non-epileptic seizures, prospective clinical experience: diagnosis, clinical features, risk factors, psychiatric comorbidity, treatment outcome. *Epileptic Disord* 2007; 9 Suppl 1:S52-8

Jedrzejczak J, Owczarek K, Majkowski J: Psychogenic pseudoepileptic seizures: clinical and electroencephalogram (EEG) video-tape recordings. *Eur J Neurol* 1999; 6:473–9

Khan AY, Baade L, Ablah E, et al.: Can hypnosis differentiate epileptic from nonepileptic events in the video/EEG monitoring unit? Data from a pilot study. *Epilepsy Behav* 2009; 15:314–317

Kim JS, Cho EJ, Park LJ, et al.: Conversion phenomenon during the induction period of general anesthesia -A case report-. *Korean J Anesthesiol* 2010; 59:210–213

Lancman ME, Asconape JJ, Craven WJ, et al.: Predictive value of induction of psychogenic seizures by suggestion. *Ann Neurol* 1994; 35:359–361

Li Y, Flood P, Cornes S: Electroencephalography of Seizure-Like Movements During General Anesthesia with Propofol: Seizures or Nonepileptic Events? *A A Case Rep* 2015; 5:195–198

Mascia A, Quarato PP, D'Aniello A, et al.: Psychogenic nonepileptic seizures mimicking gelastic seizures: A description of two cases. *Epilepsy Behav Case Rep* 2015; 4:67–69

McGonigal A, Oto M, Russell AJ, et al.: Outpatient video EEG recording in the diagnosis of non-epileptic seizures: a randomised controlled trial of simple suggestion techniques. *J Neurol Neurosurg Psychiatry* 2002; 72:549–51

Modur PN, Rigdon B: Diagnostic yield of sequential routine EEG and extended outpatient video-EEG monitoring. *Clin Neurophysiol* 2008; 119:190–6

Nežadal T, Hovorka J, Herman E, et al.: Psychogenic non-epileptic seizures: our video-EEG experience. *Neurol Res* 2011; 33:694–700

Olson DM, Howard N, Shaw RJ: Hypnosis-provoked nonepileptic events in children. *Epilepsy Behav* 2008; 12:456–459

Papavasiliou A, Vassilaki N, Paraskevoulakos E, et al.: Psychogenic status epilepticus in children. *Epilepsy Behav* 2004; 5:539–546

- Parra J, Kanner AM, Iriarte J, et al.: When should induction protocols be used in the diagnostic evaluation of patients with paroxysmal events? *Epilepsia* 1998; 39:863–7
- Perrin MW, Sahoo SK, Goodkin HP: Latency to first psychogenic nonepileptic seizure upon admission to inpatient EEG monitoring: evidence for semiological differences. *Epilepsy Behav* 2010; 19:32–5
- Popkirov S, Gronheit W, Wellmer J: A systematic review of suggestive seizure induction for the diagnosis of psychogenic nonepileptic seizures. *Seizure* 2015; 31:124–32
- Popkirov S, Gronheit W, Wellmer J: Hyperventilation and photic stimulation are useful additions to a placebo-based suggestive seizure induction protocol in patients with psychogenic nonepileptic seizures. *Epilepsy Behav* 2015; 46:88–90
- Reuber M, Fernandez G, Bauer J, et al.: Interictal EEG abnormalities in patients with psychogenic nonepileptic seizures. *Epilepsia* 2002; 43:1013–20
- Ribai P, Tugendhaft P, Legros B: Usefulness of prolonged video-EEG monitoring and provocative procedure with saline injection for the diagnosis of non epileptic seizures of psychogenic origin. *J Neurol* 2006; 253:328–32
- Slater JD, Brown MC, Jacobs W, et al.: Induction of pseudoseizures with intravenous saline placebo. *Epilepsia* 1995; 36:580–5
- Sohal AP, Khan A, Hussain N: Prolonged video-EEG in identifying paroxysmal nonepileptic events in children with epilepsy: a useful tool. *J Clin Neurophysiol* 2014; 31:149–51
- Stagno SJ, Smith ML: Use of induction procedures in diagnosing psychogenic seizures. *Journal of Epilepsy* 1996; 9:153–158
- Syed TU, LaFrance WCJ, Loddenkemper T, et al.: Outcome of ambulatory video-EEG monitoring in a 10,000 patient nationwide cohort. *Seizure* 2019; 66:104–111
- Thacker K, Devinsky O, Perrine K, et al.: Nonepileptic seizures during apparent sleep. *Ann Neurol* 1993; 33:414–418
- Varela HL, Taylor DS, Benbadis SR: Short-term outpatient EEG-video monitoring with induction in a veterans administration population. *J Clin Neurophysiol* 2007; 24:390–391
- Walczak TS, Williams DT, Berten W: Utility and reliability of placebo infusion in the evaluation of patients with seizures. *Neurology* 1994; 44:394–399
- Wassmer E, WS Donati F: Saline infusion: a diagnostic and therapeutic tool in nonepileptic attacks? *Epilepsy and Behavior* 2003; 4:500–506
- Wyllie E, Friedman D, Rothner AD, et al.: Psychogenic seizures in children and adolescents: outcome after diagnosis by ictal video and electroencephalographic recording. *Pediatrics* 1990; 85:480–484
- Zaidi A, Crampton S, Clough P, et al.: Head-up tilting is a useful provocative test for psychogenic non-epileptic seizures. *Seizure* 1999; 8:353–355

### *Psychiatric comorbidities*

- Turner K, Piazzini A, Chiesa V, et al.: Patients with epilepsy and patients with psychogenic non-epileptic seizures: video-EEG, clinical and neuropsychological evaluation. *Seizure* 2011; 20:706–710
- O'Brien FM, Fortune GM, Dicker P, et al.: Psychiatric and neuropsychological profiles of people with psychogenic nonepileptic seizures. *Epilepsy Behav* 2015; 43:39–45
- Salinsky M, Evrard C, Storzbach D, et al.: Psychiatric comorbidity in veterans with psychogenic seizures. *Epilepsy Behav* 2012; 25:345–349
- Green B, Norman P, Reuber M: Attachment style, relationship quality, and psychological distress in patients with psychogenic non-epileptic seizures versus epilepsy. *Epilepsy Behav* 2017; 66:120–126
- Yerdelen D, Altintas E: Health related quality of life in patients admitted for video-electroencephalography monitoring diagnosed with epilepsy or psychogenic non-epileptic seizures. *Neurosciences (Riyadh)* 2016; 21:47–51
- Direk N, Kulaksizoglu IB, Alpay K, et al.: Using personality disorders to distinguish between patients with psychogenic nonepileptic seizures and those with epileptic seizures. *Epilepsy Behav* 2012; 23:138–141
- Dworetzky BA, Strahonja-Packard A, Shanahan CW, et al.: Characteristics of male veterans with psychogenic nonepileptic seizures. *Epilepsia* 2005; 46:1418–1422
- Arnold LM, Privitera MD: Psychopathology and trauma in epileptic and psychogenic seizure patients. *Psychosomatics* 1996; 37:438–443
- Binzer M, Stone J, Sharpe M: Recent onset pseudoseizures--clues to aetiology. *Seizure* 2004; 13:146–155
- Schramke CJ, Kay KA, Valeriano JP, et al.: Using patient history to distinguish between patients with non-epileptic and patients with epileptic events. *Epilepsy Behav* 2010; 19:478–482
- Galimberti CA, Ratti MT, Murelli R, et al.: Patients with psychogenic nonepileptic seizures, alone or epilepsy-associated, share a psychological profile distinct from that of epilepsy patients. *J Neurol* 2003; 250:338–346

- Marchetti RL, Kurcgant D, Gallucci Neto J, et al.: Evaluating patients with suspected nonepileptic psychogenic seizures. *J Neuropsychiatry Clin Neurosci* 2009; 21:292–298
- Scevola L, Teitelbaum J, Oddo S, et al.: Psychiatric disorders in patients with psychogenic nonepileptic seizures and drug-resistant epilepsy: a study of an Argentine population. *Epilepsy Behav* 2013; 29:155–160
- Salinsky M, Storzbach D, Goy E, et al.: Traumatic brain injury and psychogenic seizures in veterans. *J Head Trauma Rehabil* 2015; 30:E65-70
- Harden CL, Jovine L, Burgut FT, et al.: A comparison of personality disorder characteristics of patients with nonepileptic psychogenic pseudoseizures with those of patients with epilepsy. *Epilepsy Behav* 2009; 14:481–483
- Holman N, Kirkby A, Duncan S, et al.: Adult attachment style and childhood interpersonal trauma in non-epileptic attack disorder. *Epilepsy Res* 2008; 79:84–89
- Tremont G, Smith MM, Bauer L, et al.: Comparison of personality characteristics on the bear-fedio inventory between patients with epilepsy and those with non-epileptic seizures. *J Neuropsychiatry Clin Neurosci* 2012; 24:47–52
- Stone J, Sharpe M, Binzer M: Motor Conversion Symptoms and Pseudoseizures: A Comparison of Clinical Characteristics. *Psychosomatics: Journal of Consultation and Liaison Psychiatry* 2004; 45:492–499
- Perez DL, Young SS, King JN, et al.: Preliminary Predictors of Initial Attendance, Symptom Burden, and Motor Subtype in a US Functional Neurological Disorders Clinic Population. *Cogn Behav Neurol* 2016; 29:197–205
- Pick S, Mellers JDC, Goldstein LH: Dissociation in patients with dissociative seizures: relationships with trauma and seizure symptoms. *Psychol Med* 2017; 47:1215–1229
- Reuber M, Pukrop R, Bauer J, et al.: Multidimensional assessment of personality in patients with psychogenic non-epileptic seizures. *J Neurol Neurosurg Psychiatry* 2004; 75:743–748

#### *Medical comorbidities*

- Anderson J, Hill J, Alford M, et al.: Healthcare resource utilization after medium-term residential assessment for epilepsy and psychogenic nonepileptic seizures. *Epilepsy Behav* 2016; 62:147–152
- Asadi-Pooya AA, Asadollahi M, Tinker J, et al.: Post-epilepsy surgery psychogenic nonepileptic seizures. *Epilepsia* 2016; 57:1691–1696
- Asadi-Pooya AA, Emami M: Demographic and clinical manifestations of psychogenic non-epileptic seizures: the impact of co-existing epilepsy in patients or their family members. *Epilepsy Behav* 2013; 27:1–3
- Barry E, Krumholz A, Bergey GK, et al.: Nonepileptic posttraumatic seizures. *Epilepsia* 1998; 39:427–431
- Benbadis SR, Agrawal V, Tatum WO 4th: How many patients with psychogenic nonepileptic seizures also have epilepsy? *Neurology* 2001; 57:915–917
- Benbadis SR: A spell in the epilepsy clinic and a history of “chronic pain” or “fibromyalgia” independently predict a diagnosis of psychogenic seizures. *Epilepsy Behav* 2005; 6:264–265
- Betts T, Boden S: Diagnosis, management and prognosis of a group of 128 patients with non-epileptic attack disorder. Part I. *Seizure* 1992; 1:19–26
- Bye AM, Kok DJ, Ferenschild FT, et al.: Paroxysmal non-epileptic events in children: a retrospective study over a period of 10 years. *J Paediatr Child Health* 2000; 36:244–248
- Chen LLK, Baca CB, Choe J, et al.: Posttraumatic epilepsy in Operation Enduring Freedom/Operation Iraqi Freedom veterans. *Mil Med* 2014; 179:492–496
- Chen-Block S, Abou-Khalil BW, Arain A, et al.: Video-EEG results and clinical characteristics in patients with psychogenic nonepileptic spells: The effect of a coexistent epilepsy. *Epilepsy Behav* 2016; 62:62–5
- Daum C, Gheorghita F, Spatola M, et al.: Interobserver agreement and validity of bedside “positive signs” for functional weakness, sensory and gait disorders in conversion disorder: a pilot study. *J Neurol Neurosurg Psychiatry* 2015; 86:425–430
- Davies KG, Blumer DP, Lobo S, et al.: De Novo Nonepileptic Seizures after Cranial Surgery for Epilepsy: Incidence and Risk Factors. *Epilepsy Behav* 2000; 1:436–443
- de Wet CJ, Mellers JDC, Gardner WN, et al.: Pseudoseizures and asthma. *J Neurol Neurosurg Psychiatry* 2003; 74:639–641
- Dixit R, Popescu A, Bagic A, et al.: Medical comorbidities in patients with psychogenic nonepileptic spells (PNES) referred for video-EEG monitoring. *Epilepsy Behav* 2013; 28:137–140
- Doss J, Caplan R, Siddarth P, et al.: Risk factors for learning problems in youth with psychogenic non-epileptic seizures. *Epilepsy Behav* 2017; 70:135–139
- Driver-Dunckley E, Stonnington CM, Locke DEC, et al.: Comparison of psychogenic movement disorders and psychogenic nonepileptic seizures: is phenotype clinically important? *Psychosomatics* 2011; 52:337–345



Duncan R, Oto M: Psychogenic nonepileptic seizures in patients with learning disability: comparison with patients with no learning disability. *Epilepsy Behav* 2008; 12:183–186

Elliott JO, Charyton C: Biopsychosocial predictors of psychogenic non-epileptic seizures. *Epilepsy Res* 2014; 108:1543–1553

Ettinger AB, Devinsky O, Weisbrodt DM, et al.: Headaches and other pain symptoms among patients with psychogenic non-epileptic seizures. *Seizure* 1999; 8:424–426

Gazzola DM, Carlson C, Rugino A, et al.: Psychogenic nonepileptic seizures and chronic pain: a retrospective case-controlled study. *Epilepsy Behav* 2012; 25:662–665

Gonzalez Otarula KA, Tan Y-L, Dubeau F, et al.: Psychogenic nonepileptic seizures in patients with surgically treated temporal lobe epilepsy: Presurgical and de novo postsurgical occurrence. *Epilepsy Behav* 2017; 75:252–255

Hara K, Adachi N, Akanuma N, et al.: Dissociative experiences in epilepsy: effects of epilepsy-related factors on pathological dissociation. *Epilepsy Behav* 2015; 44:185–191

Heard TT, Ramgopal S, Picker J, et al.: EEG abnormalities and seizures in genetically diagnosed Fragile X syndrome. *Int J Dev Neurosci* 2014; 38:155–160

Hoepner R, Labudda K, May TW, et al.: Distinguishing between patients with pure psychogenic nonepileptic seizures and those with comorbid epilepsy by means of clinical data. *Epilepsy Behav* 2014; 35:54–58

Hudak AM, Trivedi K, Harper CR, et al.: Evaluation of seizure-like episodes in survivors of moderate and severe traumatic brain injury. *J Head Trauma Rehabil* 2004; 19:290–5

Jones SG, TJ OB, Adams SJ, et al.: Clinical characteristics and outcome in patients with psychogenic nonepileptic seizures. *Psychosomatic medicine* 2010; 72:487–97

Kerr WT, Janio EA, Braesch CT, et al.: Identifying psychogenic seizures through comorbidities and medication history. *Epilepsia* 2017; 58:1852–1860

Kotsopoulos I, de Krom M, Kessels F, et al.: Incidence of epilepsy and predictive factors of epileptic and non-epileptic seizures. *Seizure* 2005; 14:175–182

Krumholz A, Niedermeyer E: Psychogenic seizures: a clinical study with follow-up data. *Neurology* 1983; 33:498–502

LaFrance WCJ, Deluca M, Machan JT, et al.: Traumatic brain injury and psychogenic nonepileptic seizures yield worse outcomes. *Epilepsia* 2013; 54:718–725

Marchetti RL, Kurcgant D, Gallucci-Neto J, et al.: Epilepsy in patients with psychogenic non-epileptic seizures. *Arq Neuropsiquiatr* 2010; 68:168–173

Markoula S, de Tisi J, Foong J, et al.: De novo psychogenic nonepileptic attacks after adult epilepsy surgery: an underestimated entity. *Epilepsia* 2013; 54:e159-162

Marquez AV, Farias ST, Apperson M, et al.: Psychogenic nonepileptic seizures are associated with an increased risk of obesity. *Epilepsy Behav* 2004; 5:88–93

Martin R, Burneo JG, Prasad A, et al.: Frequency of epilepsy in patients with psychogenic seizures monitored by video-EEG. *Neurology* 2003; 61:1791–1792

Matin N, Young SS, Williams B, et al.: Neuropsychiatric Associations With Gender, Illness Duration, Work Disability, and Motor Subtype in a U.S. Functional Neurological Disorders Clinic Population. *J Neuropsychiatry Clin Neurosci* 2017; 29:375–382

McKenzie PS, Oto M, Graham CD, et al.: Medically unexplained symptoms in patients with PNES: Do they explain poor employment outcome in patients with good seizure outcomes? *Epilepsy Behav* 2016; 59:9–12

Mokleby K, Blomhoff S, Malt UF, et al.: Psychiatric comorbidity and hostility in patients with psychogenic nonepileptic seizures compared with somatoform disorders and healthy controls. *Epilepsia* 2002; 43:193–198

Neill JC, Alvarez N: Differential diagnosis of epileptic versus pseudoepileptic seizures in developmentally disabled persons. *Appl Res Ment Retard* 1986; 7:285–298

O'Brien FM, Delanty N, Dineen C, et al.: Psychogenic non-epileptic seizures in an Irish tertiary referral centre for epilepsy. *Ir J Psychol Med* 2009; 26:174–178

O'Sullivan SS, Spillane JE, McMahon EM, et al.: Clinical characteristics and outcome of patients diagnosed with psychogenic nonepileptic seizures: a 5-year review. *Epilepsy Behav* 2007; 11:77–84

Pakalnis A, Paolicchi J: Psychogenic seizures after head injury in children. *J Child Neurol* 2000; 15:78–80

Park JH, Bokma J, Chapple K, et al.: A retrospective study of polyallergy as a marker of nonepileptic seizures in the epilepsy monitoring unit. *Psychosomatics* 2014; 55:566–571

Parra J, Iriarte J, Kanner AM: Are we overusing the diagnosis of psychogenic non-epileptic events? *Seizure* 1999; 8:223–7

Patidar Y, Gupta M, Khwaja GA, et al.: Clinical profile of psychogenic non-epileptic seizures in adults: A study of 63 cases. *Ann Indian Acad Neurol* 2013; 16:157–162

Rawat VS, Dhiman V, Sinha S, et al.: Co-morbidities and outcome of childhood psychogenic non-epileptic seizures--an observational study. *Seizure* 2015; 25:95–98

- Robbins NM, Larimer P, Bourgeois JA, et al.: Number of patient-reported allergies helps distinguish epilepsy from psychogenic nonepileptic seizures. *Epilepsy Behav* 2016; 55:174–177
- Rotge JY, Lambrecq V, Marchal C, et al.: Conversion disorder and coexisting nonepileptic seizures in patients with refractory seizures. *Epilepsy & behavior: E&B* 2009; 16:350–2
- Salinsky M, Spencer D, Boudreau E, et al.: Psychogenic nonepileptic seizures in US veterans. *Neurology* 2011; 77:945–950
- Shepard MA, Silva A, Starling AJ, et al.: Patients with psychogenic nonepileptic seizures report more severe migraine than patients with epilepsy. *Seizure* 2016; 34:78–82
- Tatum WO, Langston ME, Acton EK: Fibromyalgia and seizures. *Epileptic Disord* 2016; 18:148–154
- Thirumalai S, Abou-Khalil B, Fakhoury T, et al.: Video-EEG in the diagnosis of paroxysmal events in children with mental retardation and in children with normal intelligence. *Dev Med Child Neurol* 2001; 43:731–734
- Vignoli A, Oggioni G, De Maria G, et al.: Lennox-Gastaut syndrome in adulthood: Long-term clinical follow-up of 38 patients and analysis of their recorded seizures. *Epilepsy Behav* 2017; 77:73–78
- Vincentiis S, Valente KD, Thome-Souza S, et al.: Risk factors for psychogenic nonepileptic seizures in children and adolescents with epilepsy. *Epilepsy Behav* 2006; 8:294–298
- Walsh KE, Baneck T, Page RL, et al.: Psychogenic pseudosyncope: Not always a diagnosis of exclusion. *Pacing Clin Electrophysiol* 2018; 41:480–486
- Westbrook LE, Devinsky O, Geocadin R: Nonepileptic seizures after head injury. *Epilepsia* 1998; 39:978–982
- Wissel BD, Dwivedi AK, Gaston TE, et al.: Which patients with epilepsy are at risk for psychogenic nonepileptic seizures (PNES)? A multicenter case-control study. *Epilepsy Behav* 2016; 61:180–184

### *Psychological traits*

- Akyuz G, Kugu N, Akyuz A, et al.: Dissociation and childhood abuse history in epileptic and pseudoseizure patients. *Epileptic Disord* 2004; 6:187–192
- Alper K, Devinsky O, Perrine K, et al.: Dissociation in epilepsy and conversion nonepileptic seizures. *Epilepsia* 1997; 38:991–997
- Bakvis P, Spinhoven P, Zitman FG, et al.: Automatic avoidance tendencies in patients with psychogenic nonepileptic seizures. *Seizure* 2011; 20:628–34
- Bewley J, Murphy PN, Mallows J, et al.: Does alexithymia differentiate between patients with nonepileptic seizures, patients with epilepsy, and nonpatient controls? *Epilepsy Behav* 2005; 7:430–7
- Bodde NM, Bartelet DC, Ploegmakers M, et al.: MMPI-II personality profiles of patients with psychogenic nonepileptic seizures. *Epilepsy Behav* 2011; 20:674–80
- Bowman ES, Coons PM: The differential diagnosis of epilepsy, pseudoseizures, dissociative identity disorder, and dissociative disorder not otherwise specified. *Bull Menninger Clin* 2000; 64:164–180
- Bowman ES, Markand ON: Psychodynamics and psychiatric diagnoses of pseudoseizure subjects. *Am J Psychiatry* 1996; 153:57–63
- Bowman ES: Etiology and clinical course of pseudoseizures. Relationship to trauma, depression, and dissociation. *Psychosomatics* 1993; 34:333–342
- Brown RJ, Bouska JF, Frow A, et al.: Emotional dysregulation, alexithymia, and attachment in psychogenic nonepileptic seizures. *Epilepsy Behav* 2013; 29:178–83
- Brown RJ, Cardena E, Nijenhuis E, et al.: Should conversion disorder be reclassified as a dissociative disorder in DSM V? *Psychosomatics* 2007; 48:369–378
- Brown RJ, Reuber M: Psychological and psychiatric aspects of psychogenic non-epileptic seizures (PNES): A systematic review. *Clin Psychol Rev* 2016; 45:157–182
- Cohen ML, Testa SM, Pritchard JM, et al.: Overlap between dissociation and other psychological characteristics in patients with psychogenic nonepileptic seizures. *Epilepsy Behav* 2014; 34:47–49
- Cornaggia CM, Di Rosa G, Polita M, et al.: Conversation analysis in the differentiation of psychogenic nonepileptic and epileptic seizures in pediatric and adolescent settings. *Epilepsy Behav* 2016; 62:231–238
- Cornaggia CM, Gugliotta SC, Magaudda A, et al.: Conversation analysis in the differential diagnosis of Italian patients with epileptic or psychogenic non-epileptic seizures: a blind prospective study. *Epilepsy Behav* 2012; 25:598–604
- Cronje G, Pretorius C: The coping styles and health-related quality of life of South African patients with psychogenic nonepileptic seizures. *Epilepsy Behav* 2013; 29:581–4
- Dikel TN, Fennell EB, Gilmore RL: Posttraumatic stress disorder, dissociation, and sexual abuse history in epileptic and nonepileptic seizure patients. *Epilepsy Behav* 2003; 4:644–650
- Dimaro LV, Dawson DL, Roberts NA, et al.: Anxiety and avoidance in psychogenic nonepileptic seizures: the role of implicit and explicit anxiety. *Epilepsy Behav* 2014; 33:77–86

- Fleisher W, Staley D, Krawetz P, et al.: Comparative study of trauma-related phenomena in subjects with pseudoseizures and subjects with epilepsy. *Am J Psychiatry* 2002; 159:660–663
- Goldstein LH, Drew C, Mellers J, et al.: Dissociation, hypnotizability, coping styles and health locus of control: characteristics of pseudoseizure patients. *Seizure* 2000; 9:314–22
- Goldstein LH, Mellers JDC: Ictal symptoms of anxiety, avoidance behaviour, and dissociation in patients with dissociative seizures. *J Neurol Neurosurg Psychiatry* 2006; 77:616–621
- Harden CL: Pseudoseizures and dissociative disorders: a common mechanism involving traumatic experiences. *Seizure* 1997; 6:151–155
- Jenkins L, Cosgrove J, Chappell P, et al.: Neurologists can identify diagnostic linguistic features during routine seizure clinic interactions: results of a one-day teaching intervention. *Epilepsy Behav* 2016; 64:257–261
- Kaplan MJ, Dwivedi AK, Privitera MD, et al.: Comparisons of childhood trauma, alexithymia, and defensive styles in patients with psychogenic non-epileptic seizures vs. epilepsy: Implications for the etiology of conversion disorder. *J Psychosom Res* 2013; 75:142–146
- Kuyk J, Spinhoven P, van Emde Boas W, et al.: Dissociation in temporal lobe epilepsy and pseudo-epileptic seizure patients. *J Nerv Ment Dis* 1999; 187:713–720
- Lawton G, Baker GA, Brown RJ: Comparison of two types of dissociation in epileptic and nonepileptic seizures. *Epilepsy Behav* 2008; 13:333–336
- Litwin R, Cardeña E: Demographic and seizure variables, but not hypnotizability or dissociation, differentiated psychogenic from organic seizures. *Journal of Trauma & Dissociation* 2000; 1:99–122
- Mazza M, Della Marca G, Martini A, et al.: Non-Epileptic Seizures (NES) are predicted by depressive and dissociative symptoms. *Epilepsy Res* 2009; 84:91–96
- Myers L, Matzner B, Lancman M, et al.: Prevalence of alexithymia in patients with psychogenic non-epileptic seizures and epileptic seizures and predictors in psychogenic non-epileptic seizures. *Epilepsy Behav* 2013; 26:153–7
- Nijenhuis E: *Somatoform Dissociation: Phenomena, Measurement and Theoretical Issues*, Assen, the Netherlands, Van Gorcum, 1999
- Novakova B, Howlett S, Baker R, et al.: Emotion processing and psychogenic non-epileptic seizures: A cross-sectional comparison of patients and healthy controls. *Seizure* 2015; 29:4–10
- Plug L, Sharrack B, Reuber M: Conversation analysis can help to distinguish between epilepsy and non-epileptic seizure disorders: a case comparison. *Seizure* 2009; 18:43–50
- Proenca ICGF, Castro LHM, Jorge CL, et al.: Emotional trauma and abuse in patients with psychogenic nonepileptic seizures. *Epilepsy Behav* 2011; 20:331–333
- Prueter C, Schultz-Venrath U, Rimpau W: Dissociative and associated psychopathological symptoms in patients with epilepsy, pseudoseizures, and both seizure forms. *Epilepsia* 2002; 43:188–192
- Reuber M, House AO, Pukrop R, et al.: Somatization, dissociation and general psychopathology in patients with psychogenic non-epileptic seizures. *Epilepsy Res* 2003; 57:159–167
- Reuber M, Pukrop R, Bauer J, et al.: Outcome in psychogenic nonepileptic seizures: 1 to 10-year follow-up in 164 patients. *Ann Neurol* 2003; 53:305–11
- Roberts NA, Burseson MH, Weber DJ, et al.: Emotion in psychogenic nonepileptic seizures: responses to affective pictures. *Epilepsy Behav* 2012; 24:107–15
- Schonenberg M, Jusyte A, Hohnle N, et al.: Theory of mind abilities in patients with psychogenic nonepileptic seizures. *Epilepsy Behav* 2015; 53:20–4
- Schwabe M, Howell SJ, Reuber M: Differential diagnosis of seizure disorders: a conversation analytic approach. *Soc Sci Med* 2007; 65:712–724
- Schwabe M, Reuber M, Schondienst M, et al.: Listening to people with seizures: how can linguistic analysis help in the differential diagnosis of seizure disorders? *Commun Med* 2008; 5:59–72
- van Merode T, Twellaar M, Kotsopoulos IAW, et al.: Psychological characteristics of patients with newly developed psychogenic seizures. *J Neurol Neurosurg Psychiatry* 2004; 75:1175–1177
- Willment K, Hill M, Baslet G, et al.: Cognitive impairment and evaluation in psychogenic nonepileptic seizures: an integrated cognitive-emotional approach. *Clin EEG Neurosci* 2015; 46:42–53

### *Psychometric and neuropsychological measures*

- Ali F, Rickards H, Bagary M, et al.: Ictal consciousness in epilepsy and nonepileptic attack disorder. *Epilepsy Behav* 2010; 19:522–525
- Bakvis P, Spinhoven P, Putman P, et al.: The effect of stress induction on working memory in patients with psychogenic nonepileptic seizures. *Epilepsy Behav* 2010; 19:448–454

- Cavanna AE, Monaco F: Brain mechanisms of altered conscious states during epileptic seizures. *Nat Rev Neurol* 2009; 5:267–276
- Cavanna AE, Mula M, Servo S, et al.: Measuring the level and content of consciousness during epileptic seizures: the Ictal Consciousness Inventory. *Epilepsy Behav* 2008; 13:184–188
- Cragar DE, Berry DTR, Fakhoury TA, et al.: A review of diagnostic techniques in the differential diagnosis of epileptic and nonepileptic seizures. *Neuropsychol Rev* 2002; 12:31–64
- del Barrio A, Jimenez-Huete A, Toledano R, et al.: Validity of the clinical and content scales of the Multiphasic Personality Inventory Minnesota 2 for the diagnosis of psychogenic non-epileptic seizures. *Neurologia* 2016; 31:106–112
- Del Bene VA, Arce Renteria M, Maiman M, et al.: Increased odds and predictive rates of MMPI-2-RF scale elevations in patients with psychogenic non-epileptic seizures and observed sex differences. *Epilepsy Behav* 2017; 72:43–50
- Dodrill CB: Use of neuropsychological and personality testing to identify adults with psychogenic nonepileptic seizures, in Schachter SC, LaFrance WC Jr (Editors). *Gates and Rowan's Nonepileptic Seizures*, 3rd ed. Cambridge, Cambridge University Press, 2010, pp 136–141
- Gale SD, Hill SW: Concurrent administration of the MMPI-2 and PAI in a sample of patients with epileptic or non-epileptic seizures: implications for an inpatient epilepsy monitoring unit. *Epilepsy Behav* 2012; 25:181–184
- Gul A, Ahmad H: Cognitive deficits and emotion regulation strategies in patients with psychogenic nonepileptic seizures: a task-switching study. *Epilepsy Behav* 2014; 32:108–113
- Hill SW, Gale SD: Predicting psychogenic nonepileptic seizures with the Personality Assessment Inventory and seizure variables. *Epilepsy Behav* 2011; 22:505–510
- Holmes MD, Dodrill CB, Bachtler S, et al.: Evidence That Emotional Maladjustment Is Worse in Men Than in Women with Psychogenic Nonepileptic Seizures. *Epilepsy Behav* 2001; 2:568–573
- Johnson AL, Storzbach D, Binder LM, et al.: MMPI-2 profiles: fibromyalgia patients compared to epileptic and non-epileptic seizure patients. *Clin Neuropsychol* 2010; 24:220–234
- Locke DEC, Kirilin KA, Thomas ML, et al.: The Minnesota Multiphasic Personality Inventory-2-Restructured Form in the epilepsy monitoring unit. *Epilepsy Behav* 2010; 17:252–258
- Locke DEC, Kirilin KA, Wershba R, et al.: Randomized comparison of the Personality Assessment Inventory and the Minnesota Multiphasic Personality Inventory-2 in the epilepsy monitoring unit. *Epilepsy Behav* 2011; 21:397–401
- Locke DEC, Thomas ML: Initial development of Minnesota Multiphasic Personality Inventory-2-Restructured Form (MMPI-2-RF) scales to identify patients with psychogenic nonepileptic seizures. *J Clin Exp Neuropsychol* 2011; 33:335–343
- Myers L, Fleming M, Lancman M, et al.: Stress coping strategies in patients with psychogenic non-epileptic seizures and how they relate to trauma symptoms, alexithymia, anger and mood. *Seizure* 2013; 22:634–639
- Myers L, Perrine K, Lancman M, et al.: Psychological trauma in patients with psychogenic nonepileptic seizures: trauma characteristics and those who develop PTSD. *Epilepsy Behav* 2013; 28:121–126
- Myers L, Zeng R, Perrine K, et al.: Cognitive differences between patients who have psychogenic nonepileptic seizures (PNESs) and posttraumatic stress disorder (PTSD) and patients who have PNESs without PTSD. *Epilepsy Behav* 2014; 37:82–86
- Owczarek K, Jedrzejczak J: Patients with coexistent psychogenic pseudoepileptic and epileptic seizures: a psychological profile. *Seizure* 2001; 10:566–569
- Owczarek K: Anxiety as a differential factor in epileptic versus psychogenic pseudoepileptic seizures. *Epilepsy Res* 2003; 52:227–232
- Owczarek K: Somatisation indexes as differential factors in psychogenic pseudoepileptic and epileptic seizures. *Seizure* 2003; 12:178–81
- Peck CP, Schroeder RW, Heinrichs RJ, et al.: Differences in MMPI-2 FBS and RBS scores in brain injury, probable malingering, and conversion disorder groups: a preliminary study. *Clin Neuropsychol* 2013; 27:693–707
- Prigatano GP, Kirilin KA: Cognitive complaints and their relationship to neuropsychological function in adults with psychogenic nonepileptic seizures., in Schachter SC, LaFrance WC Jr (Editors). *Gates and Rowan's Nonepileptic Seizures*, 3rd ed. Cambridge, Cambridge University Press, 2010, pp 142–148
- Reuber M, Rawlings GH: Nonepileptic seizures - subjective phenomena. *Handb Clin Neurol* 2016; 139:283–296
- Roberts NA, Reuber M: Alterations of consciousness in psychogenic nonepileptic seizures: emotion, emotion regulation and dissociation. *Epilepsy Behav* 2014; 30:43–49
- Russell H, Coady EL, Chaytor N: The impact of seizure-related items and comorbid medical conditions on the MMPI-2 profiles of patients with epilepsy and psychogenic nonepileptic seizures. *Epilepsy Behav* 2009; 15:325–329

- Schramke CJ, Valeri A, Valeriano JP, et al.: Using the Minnesota Multiphasic Inventory 2, EEGs, and clinical data to predict nonepileptic events. *Epilepsy Behav* 2007; 11:343–346
- Storzbach D, Binder LM, Salinsky MC, et al.: Improved prediction of nonepileptic seizures with combined MMPI and EEG measures. *Epilepsia* 2000; 41:332–337
- Thomas ML, Locke DEC: Psychometric properties of the MMPI-2-RF Somatic Complaints (RC1) scale. *Psychol Assess* 2010; 22:492–503
- Thompson AW, Hantke N, Phatak V, et al.: The Personality Assessment Inventory as a tool for diagnosing psychogenic nonepileptic seizures. *Epilepsia* 2010; 51:161–164
- Wagner MT, Wymer JH, Topping KB, et al.: Use of the Personality Assessment Inventory as an efficacious and cost-effective diagnostic tool for nonepileptic seizures. *Epilepsy Behav* 2005; 7:301–304
- Walterfang M, Choi Y, O'Brien TJ, et al.: Utility and validity of a brief cognitive assessment tool in patients with epileptic and nonepileptic seizures. *Epilepsy Behav* 2011; 21:177–183
- Wershba RE, Locke DEC, Lanyon RI: Analysis of Minnesota Multiphasic Personality Inventory-2-Restructured Form response bias indicators as suppressors or moderators in a medical setting. *Psychol Assess* 2015; 27:733–737
- Wilkus RJ, Dodrill CB, Thompson PM: Intensive EEG monitoring and psychological studies of patients with pseudoepileptic seizures. *Epilepsia* 1984; 25:100–107
- Yamout KZ, Heinrichs RJ, Baade LE, et al.: Comparative prediction of nonepileptic events using MMPI-2 clinical scales, Harris Lingoes subscales, and restructured clinical scales. *Epilepsy Behav* 2017; 68:31–34

### *Clinical neuroimaging*

- Arthuis M, Micoulaud-Franchi JA, Bartolomei F, et al.: Resting cortical PET metabolic changes in psychogenic non-epileptic seizures (PNES). *Journal of neurology, neurosurgery, and psychiatry* 2015; 86:1106–12
- Beach R, Reading R: The importance of acknowledging clinical uncertainty in the diagnosis of epilepsy and non-epileptic events. *Arch Dis Child* 2005; 90:1219–22
- Benbadis SR, Tatum WO th, Murtagh FR, et al.: MRI evidence of mesial temporal sclerosis in patients with psychogenic nonepileptic seizures. *Neurology* 2000; 55:1061–2
- Bhatia MS, Sapa S: Pseudoseizures in Children: A Profile of 50 Cases. *Clinical Pediatrics* 2005; 44:617–621
- Biraben A, Taussig D, Bernard AM, et al.: Video-EEG and ictal SPECT in three patients with both epileptic and non-epileptic seizures. *Epileptic disorders : international epilepsy journal with videotape* 1999; 1:51–5
- Blend MJ, de Leon OA, Jobe TH, et al.: Cerebral perfusion SPECT imaging in epileptic and nonepileptic seizures. *Clinical nuclear medicine* 1997; 22:363–8
- Bolen RD, Koontz EH, Pritchard PB 3rd: Prevalence and distribution of MRI abnormalities in patients with psychogenic nonepileptic events. *Epilepsy & behavior : E&B* 2016; 59:73–6
- Bora IH, Taskapilioglu O, Seferoglu M, et al.: Sociodemographics, clinical features, and psychiatric comorbidities of patients with psychogenic nonepileptic seizures: Experience at a specialized epilepsy center in turkey. *Seizure* 2011; 20:458–461
- Devinsky O, Mesad S, Alper K: Nondominant hemisphere lesions and conversion nonepileptic seizures. *The Journal of neuropsychiatry and clinical neurosciences* 2001; 13:367–73
- Devinsky O, Sanchez-Villasenor F, Vazquez B, et al.: Clinical profile of patients with epileptic and nonepileptic seizures. *Neurology* 1996; 46:1530–3
- Drake ME, Pakalnis A, Phillips BB: Neuropsychological and psychiatric correlates of intractable pseudoseizures. *Seizure* 1992; 1:11–13
- Drane DL, Williamson DJ, Stroup ES, et al.: Cognitive impairment is not equal in patients with epileptic and psychogenic nonepileptic seizures. *Epilepsia* 2006; 47:1879–86
- Dula DJ, DeNaples L: Emergency department presentation of patients with conversion disorder. *Academic emergency medicine : official journal of the Society for Academic Emergency Medicine* 1995; 2:120–3
- Ettinger AB, Coyle PK, Jandorf L, et al.: Postictal SPECT in epileptic versus nonepileptic seizures. *Journal of Epilepsy* 1998; 11:67–73
- Gibbs J, Appleton RE, Carty H, et al.: Focal electroencephalographic abnormalities and computerised tomography findings in children with seizures. *Journal of neurology, neurosurgery, and psychiatry* 1993; 56:369–71
- Hakami T, McIntosh A, Todaro M, et al.: MRI-identified pathology in adults with new-onset seizures. *Neurology* 2013; 81:920–7
- Kanner AM, Parra J, Frey M, et al.: Psychiatric and neurologic predictors of psychogenic pseudoseizure outcome. *Neurology* 1999; 53:933–938
- Kerr WT, Cho AY, Anderson A, et al.: Balancing Clinical and Pathologic Relevance in the Machine Learning Diagnosis of Epilepsy. *Int Workshop Pattern Recognit Neuroimaging* 2013; 2013:86–89

- Kerr WT, Hwang ES, Raman KR, et al.: Multimodal diagnosis of epilepsy using conditional dependence and multiple imputation. *Int Workshop Pattern Recognit Neuroimaging* 2014; 1–4
- Kerr WT, Nguyen ST, Cho AY, et al.: Computer-Aided Diagnosis and Localization of Lateralized Temporal Lobe Epilepsy Using Interictal FDG-PET. *Frontiers in neurology* 2013; 4:31
- Kipervasser S, Fried I, Korczyn AD, et al.: Cortical lesions associated with transient neurological symptoms - not always a matter of cause and effect. *Eur J Neurol* 2003; 10:721–5
- Kotsopoulos IA, de Krom MC, Kessels FG, et al.: The diagnosis of epileptic and non-epileptic seizures. *Epilepsy research* 2003; 57:59–67
- Kristensen O, Alving J: Pseudoseizures: Risk factors and prognosis: A case-control study. *Acta Neurologica Scandinavica* 1992; 85:177–180
- Lelliott PT, Fenwick P: Cerebral pathology in pseudoseizures. *Acta neurologica Scandinavica* 1991; 83:129–32
- Lobello K, Morgenlander JC, Radtke RA, et al.: Video/EEG monitoring in the evaluation of paroxysmal behavioral events: duration, effectiveness, and limitations. *Epilepsy Behav* 2006; 8:261–6
- Neiman ES, Noe KH, Drazkowski JF, et al.: Utility of subtraction ictal SPECT when video-EEG fails to distinguish atypical psychogenic and epileptic seizures. *Epilepsy & behavior: E&B* 2009; 15:208–12
- Raymond AA, Gilmore WV, Scott CA, et al.: Video-EEG telemetry: apparent manifestation of both epileptic and non-epileptic attacks causing potential diagnostic pitfalls. *Epileptic Disord* 1999; 1:101–6
- Reuber M, Fernandez G, Helmstaedter C, et al.: Evidence of brain abnormality in patients with psychogenic nonepileptic seizures. *Epilepsy Behav* 2002; 3:249–254
- Reuber M, Qurishi A, Bauer J, et al.: Are there physical risk factors for psychogenic non-epileptic seizures in patients with epilepsy? *Seizure* 2003; 12:561–7
- Spanaki MV, Spencer SS, Corsi M, et al.: The role of quantitative ictal SPECT analysis in the evaluation of nonepileptic seizures. *Journal of neuroimaging: official journal of the American Society of Neuroimaging* 1999; 9:210–6
- Swartz BE, Brown C, Mandelkern MA, et al.: The use of 2-deoxy-2-[18F]fluoro-D-glucose (FDG-PET) positron emission tomography in the routine diagnosis of epilepsy. *Molecular imaging and biology: MIB: the official publication of the Academy of Molecular Imaging* 2002; 4:245–52
- Tamer SK: The pediatric non-epileptic seizure. *Indian journal of pediatrics* 1997; 64:671–6
- Varma AR, Moriarty J, Costa DC, et al.: HMPAO SPECT in non-epileptic seizures: preliminary results. *Acta neurologica Scandinavica* 1996; 94:88–92
- Verrotti A, Agostinelli S, Mohn A, et al.: Clinical features of psychogenic non-epileptic seizures in prepubertal and pubertal patients with idiopathic epilepsy. *Neurological sciences: official journal of the Italian Neurological Society and of the Italian Society of Clinical Neurophysiology* 2009; 30:319–23
- Wieshmann UC: Clinical application of neuroimaging in epilepsy. *Journal of neurology, neurosurgery, and psychiatry* 2003; 74:466–70

#### *Autonomic nervous system function*

- Bakvis P, Roelofs K, Kuyk J, et al.: Trauma, stress, and preconscious threat processing in patients with psychogenic nonepileptic seizures. *Epilepsia* 2009; 50:1001–1011
- Chen L, Knight EMP, Tuxhorn I, et al.: Paroxysmal non-epileptic events in infants and toddlers: A phenomenologic analysis. *Psychiatry Clin Neurosci* 2015; 69:351–359
- Grubb BP, Gerard G, Wolfe DA, et al.: Syncope and seizures of psychogenic origin: identification with head-upright tilt table testing. *Clin Cardiol* 1992; 15:839–842
- Jeppesen J, Beniczky S, Johansen P, et al.: Comparing maximum autonomic activity of psychogenic non-epileptic seizures and epileptic seizures using heart rate variability. *Seizure* 2016; 37:13–19
- Kozłowska K, Palmer DM, Brown KJ, et al.: Reduction of autonomic regulation in children and adolescents with conversion disorders. *Psychosom Med* 2015; 77:356–370
- Krishnan V, Krishnamurthy KB: Interictal 12-lead electrocardiography in patients with epilepsy. *Epilepsy Behav* 2013; 29:240–246
- Mathias CJ, Deguchi K, Bleasdale-Barr K, et al.: Familial vasovagal syncope and pseudosyncope: observations in a case with both natural and adopted siblings. *Clin Auton Res* 2000; 10:43–45
- Mungen B, Berilgen MS, Arikanoğlu A: Autonomic nervous system functions in interictal and postictal periods of nonepileptic psychogenic seizures and its comparison with epileptic seizures. *Seizure* 2010; 19:269–273
- Nousiainen U, Mervaala E, Ylinen A, et al.: The importance of the electrocardiogram in ambulatory electroencephalographic recordings. *Arch Neurol* 1989; 46:1171–1174
- Oliveira GR de, Gondim F de AA, Hogan ER, et al.: Movement-induced heart rate changes in epileptic and non-epileptic seizures. *Arq Neuropsiquiatr* 2009; 67:789–791

- Oliveira GR de, Gondim F de AA, Hogan RE, et al.: Heart rate analysis differentiates dialeptic complex partial temporal lobe seizures from auras and non-epileptic seizures. *Arq Neuropsiquiatr* 2007; 65:565–568
- Opherk C, Hirsch LJ: Ictal heart rate differentiates epileptic from non-epileptic seizures. *Neurology* 2002; 58:636–638
- Pick S, Mellers JDC, Goldstein LH: Explicit Facial Emotion Processing in Patients With Dissociative Seizures. *Psychosom Med* 2016; 78:874–885
- Ponnusamy A, Marques JLB, Reuber M: Comparison of heart rate variability parameters during complex partial seizures and psychogenic nonepileptic seizures. *Epilepsia* 2012; 53:1314–1321
- Ponnusamy A, Marques JLB, Reuber M: Heart rate variability measures as biomarkers in patients with psychogenic nonepileptic seizures: potential and limitations. *Epilepsy Behav* 2011; 22:685–691
- Ramos JA, Brull SJ: Psychogenic non-epileptic seizures in the post-anesthesia recovery unit. *Braz J Anesthesiol* 2016; 66:426–429
- Reinsberger C, Perez DL, Murphy MM, et al.: Pre- and postictal, not ictal, heart rate distinguishes complex partial and psychogenic nonepileptic seizures. *Epilepsy Behav* 2012; 23:68–70
- Reinsberger C, Sarkis R, Papadelis C, et al.: Autonomic changes in psychogenic nonepileptic seizures: toward a potential diagnostic biomarker? *Clin EEG Neurosci* 2015; 46:16–25
- van der Kruijs SJM, Vonck KEJ, Langereis GR, et al.: Autonomic nervous system functioning associated with psychogenic nonepileptic seizures: Analysis of heart rate variability. *Epilepsy Behav* 2016; 54:14–19

### *Prolactin level*

- Alving J: Serum prolactin levels are elevated also after pseudo-epileptic seizures. *Seizure* 1998; 7:85–89
- Anzola GP: Predictivity of plasma prolactin levels in differentiating epilepsy from pseudoseizures: a prospective study. *Epilepsia* 1993; 34:1044–1048
- Aydin S, Dag E, Ozkan Y, et al.: Time-dependent changes in the serum levels of prolactin, nesfatin-1 and ghrelin as a marker of epileptic attacks young male patients. *Peptides* 2011; 32:1276–1280
- Bauer J, Stefan H, Schrell U, et al.: Serum prolactin concentrations and epilepsy. A study which compares healthy subjects with a group of patients in presurgical evaluation and circadian variations with those related to seizures. *Eur Arch Psychiatry Clin Neurosci* 1992; 241:365–371
- Chen DK, So YT, Fisher RS: Use of serum prolactin in diagnosing epileptic seizures: report of the Therapeutics and Technology Assessment Subcommittee of the American Academy of Neurology. *Neurology* 2005; 65:668–675
- Collins WC, Lanigan O, Callaghan N: Plasma prolactin concentrations following epileptic and pseudoseizures. *J Neurol Neurosurg Psychiatry* 1983; 46:505–508
- Cuthill FM, Espie CA: Sensitivity and specificity of procedures for the differential diagnosis of epileptic and non-epileptic seizures: a systematic review. *Seizure* 2005; 14:293–303
- Ehsan T, Fisher RS, Johns D, et al.: Sensitivity and specificity of paired capillary prolactin measurement in diagnosis of seizures. *Journal of Epilepsy* 1996; 9:101–105
- Fisher RS, Chan DW, Bare M, et al.: Capillary prolactin measurement for diagnosis of seizures. *Ann Neurol* 1991; 29:187–190
- Meierkord H, Shorvon S, Lightman S, et al.: Comparison of the effects of frontal and temporal lobe partial seizures on prolactin levels. *Arch Neurol* 1992; 49:225–230
- Pritchard PB 3rd, Wannamaker BB, Sagel J, et al.: Serum prolactin and cortisol levels in evaluation of pseudoepileptic seizures. *Ann Neurol* 1985; 18:87–89
- Rao ML, Stefan H, Bauer J: Epileptic but not psychogenic seizures are accompanied by simultaneous elevation of serum pituitary hormones and cortisol levels. *Neuroendocrinology* 1989; 49:33–39
- Shukla G, Bhatia M, Vivekanandhan S, et al.: Serum prolactin levels for differentiation of nonepileptic versus true seizures: limited utility. *Epilepsy Behav* 2004; 5:517–521
- Singh UK, Jana UK: Plasma prolactin in epilepsy and pseudoseizures. *Indian Pediatr* 1994; 31:667–669
- Tharyan P, Kuruville K, Prabhakar S: Serum prolactin changes in epilepsy and hysteria. *Indian J Psychiatry* 1988; 30:145–152
- Valdizan JR, Vergara JM, Rodriguez JP, et al.: Nocturnal prolactin and growth hormone levels in children with complex partial and generalized tonic-clonic seizures. *Acta Neurol Scand* 1992; 86:139–141
- Willert C, Spitzer C, Kusserow S, et al.: Serum neuron-specific enolase, prolactin, and creatine kinase after epileptic and psychogenic non-epileptic seizures. *Acta Neurol Scand* 2004; 109:318–323
- Wroe SJ, Henley R, John R, et al.: The clinical value of serum prolactin measurement in the differential diagnosis of complex partial seizures. *Epilepsy Res* 1989; 3:248–252

### *Diagnostic formulation*

- Jimenez XF, Bautista JF, Tesar GE: Diagnostic assessment and case formulation in psychogenic nonepileptic seizures: A pilot comparison of approaches. *Epilepsy Behav* 2015; 45:164–168
- Jones B, Reuber M, Norman P: Correlates of health-related quality of life in adults with psychogenic nonepileptic seizures: A systematic review. *Epilepsia* 2016; 57:171–181
- Kanaan RA, Armstrong D, Wessely S: The role of psychiatrists in diagnosing conversion disorder: a mixed-methods analysis. *Neuropsychiatr Dis Treat* 2016; 12:1181–1184
- Karterud HN, Risor MB, Haavet OR: The impact of conveying the diagnosis when using a biopsychosocial approach: A qualitative study among adolescents and young adults with NES (non-epileptic seizures). *Seizure* 2015; 24:107–113
- Kozłowska K, Scher S, Williams LM: Patterns of emotional-cognitive functioning in pediatric conversion patients: implications for the conceptualization of conversion disorders. *Psychosom Med* 2011; 73:775–788
- Martínez-Taboas A: Psychogenic Seizures in an Espiritismo Context: The Role of Culturally Sensitive Psychotherapy. *Psychotherapy: Theory, Research, Practice, Training* 2005; 42:6–13
- Plioplys S, Doss J, Siddarth P, et al.: A multisite controlled study of risk factors in pediatric psychogenic nonepileptic seizures. *Epilepsia* 2014; 55:1739–1747
- Quinn MC, Schofield MJ, Middleton W: Permission to speak: therapists' understandings of psychogenic nonepileptic seizures and their treatment. *J Trauma Dissociation* 2010; 11:108–123
- Reuber M, Brown RJ: Understanding psychogenic nonepileptic seizures-Phenomenology, semiology and the Integrative Cognitive Model. *Seizure* 2017; 44:199–205
- Reuber M, Mayor R: Recent progress in the understanding and treatment of nonepileptic seizures. *Curr Opin Psychiatry* 2012; 25:244–250
- Wiseman H, Reuber M: New insights into psychogenic nonepileptic seizures 2011-2014. *Seizure* 2015; 29:69–80
- Wood BL, Haque S, Weinstock A, et al.: Pediatric stress-related seizures: conceptualization, evaluation, and treatment of nonepileptic seizures in children and adolescents. *Curr Opin Pediatr* 2004; 16:523–531
